# Supplementary material for: Proteinaceous microspheres for targeted RNA delivery prepared by an ultrasonic emulsification method
Source: Royal Society of Chemistry journal article supplement (doi:10.1039/c2tb00012a), 2012-10-22
Supplement: c2tb00012a.pdf [file c2tb00012a.pdf]

## Supporting Information

| Type of PMs    | Average Size (nm) | Polydispersity index (PDI) | z-potential (meV) |
|----------------|-------------------|----------------------------|-------------------|
| Uncoated PMs   | 1500              | 0.4                        | -40               |
| PVA coated PMs | 1530              | 0.6                        | 0                 |
| PEI coated PMs | 1530              | 0.68                       | +20               |

**Table 1S.** Summary of the average size changes due to polymeric coatings applied to PMs. The average size and surface charge changes were measured by DLS technique.

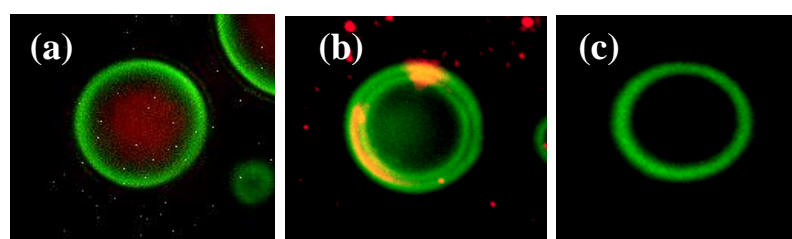

**Figure 2S.** Fluorescent microscopy images of FITC-BSA microspheres loaded with tagged RNA. (a) FITC-BSA (green) sphere with encapsulated Cy3-RNA (red) inside; (b) FITC-BSA sphere with Cy3-RNA-6FAM inside; (c) hollow FITC-BSA sphere.

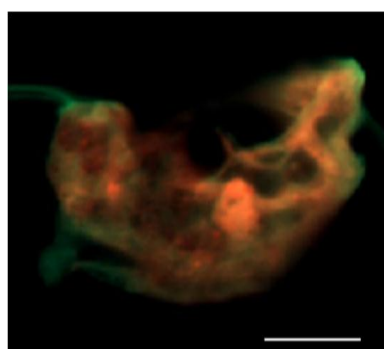

**Figure 3S.** Confocal microscopy image of fitc-BSA-Cy3-RNA aggregate in water solution. Green signal belong to fluorescent signal which emits from FITC-BSA and red signal belong to Cy3 labeled RNA. Scale Bar = 5 $\mu$ m.

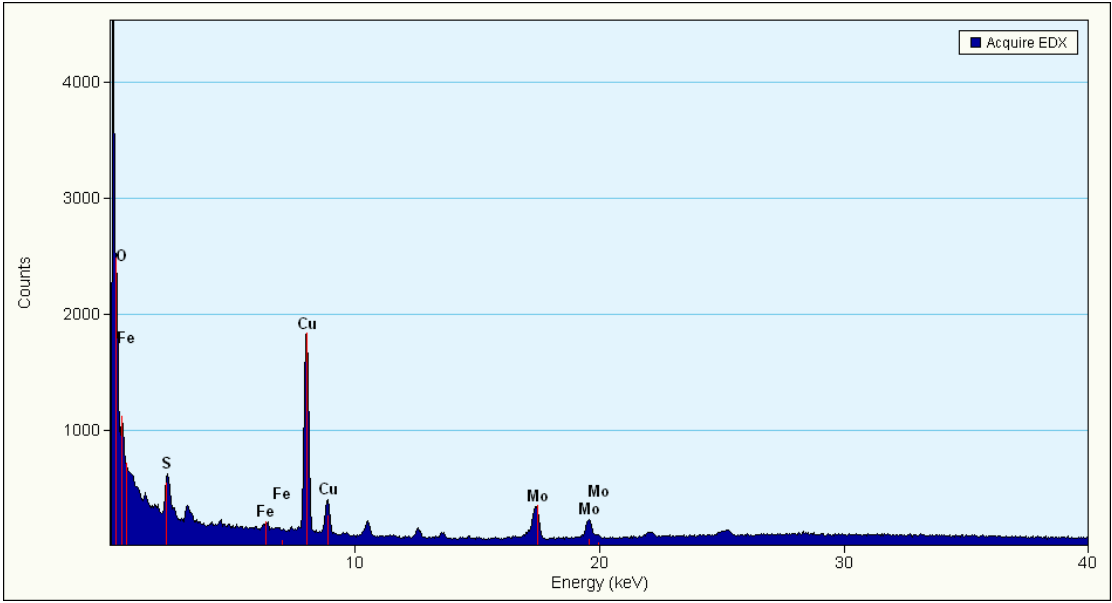

**Figure 4S.** EDS elemental analysis of iron coated sphere.
